# Supplementary material
Source: PubMed Central journal article supplement (PMC10371054)
Supplement: NIHMS1881772-supplement-1.pdf [file NIHMS1881772-supplement-1.pdf]

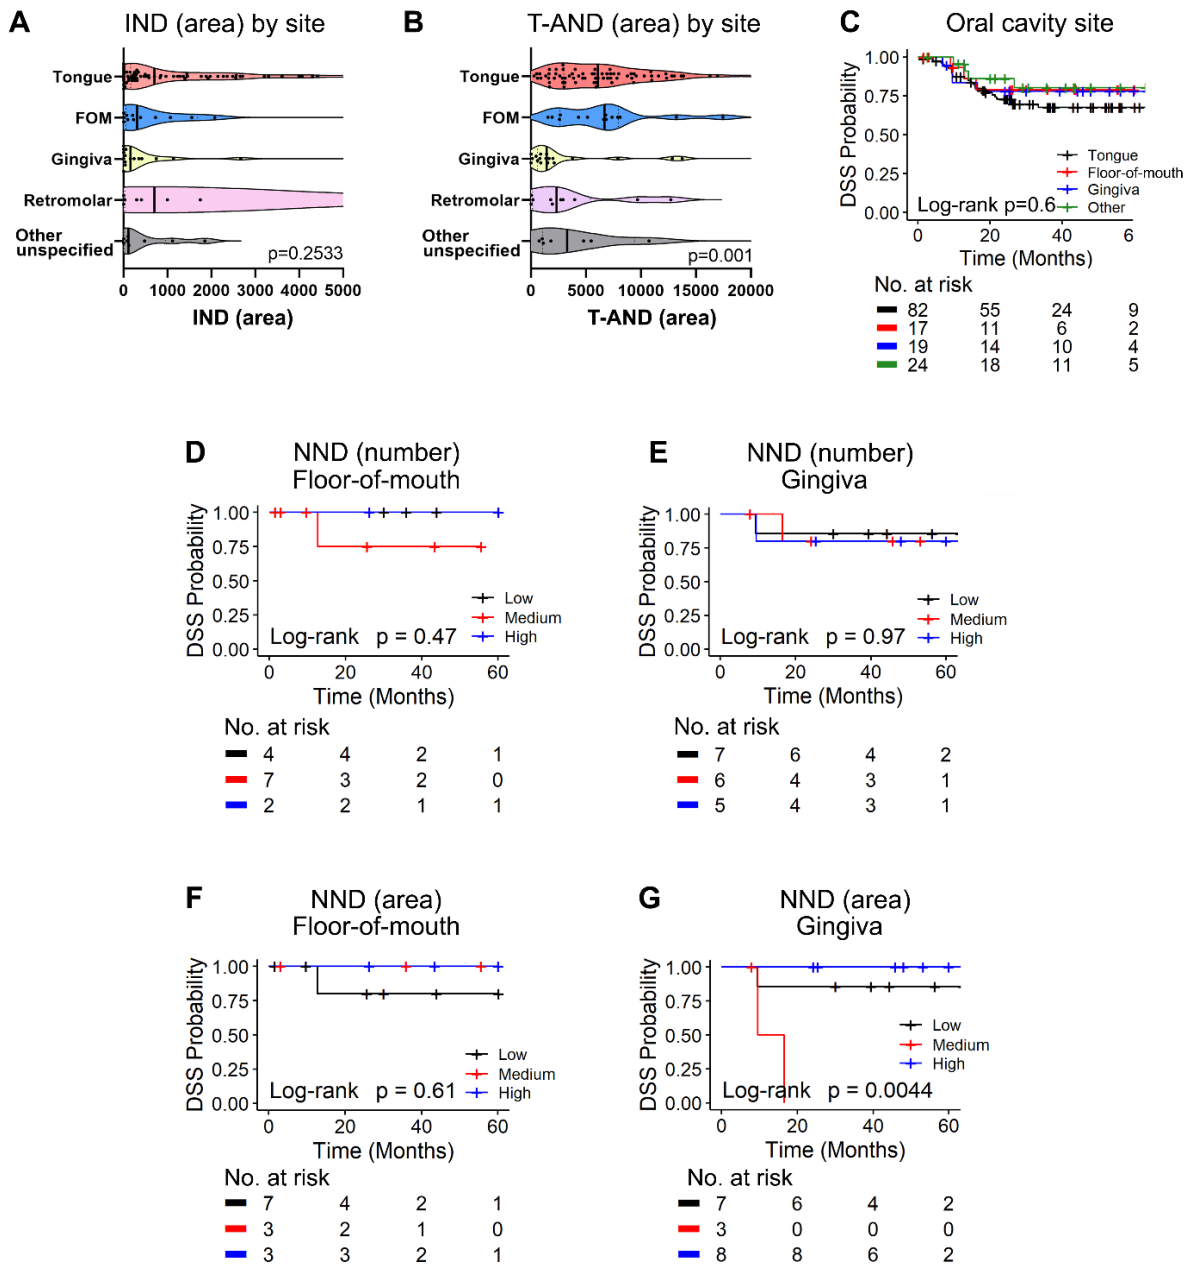

**Supplementary Figure 1:** IND (**A**) and T-AND (**B**) measured by area of nerves with patients grouped by tumor location. Kruskal-Wallis test was used in **A** and **B**, a few datapoints were excluded from the plots for better representation but all data was considered for analysis. **C**, Kaplan-Meier curve of DSS with patients split by tumor location. The number of patients at risk for each time point is shown below each plot; the p-value for tongue versus all other sites is 0.2. **D-G** show association of low, medium and high NND with DDS in floor-of-mouth (**D** and **F**) and gingiva (**E** and **G**) tumors for both number and area of nerves. Kaplan-Meier survival curves with log-rank statistics are shown in **D** through **G**; patients are split by tertiles of NND and the number of patients at risk for each time point is shown below each plot.
