# Supplementary material
Source: PubMed Central journal article supplement (PMC10371054)
Supplement: NIHMS1881772-supplement-2.pdf [file NIHMS1881772-supplement-2.pdf]

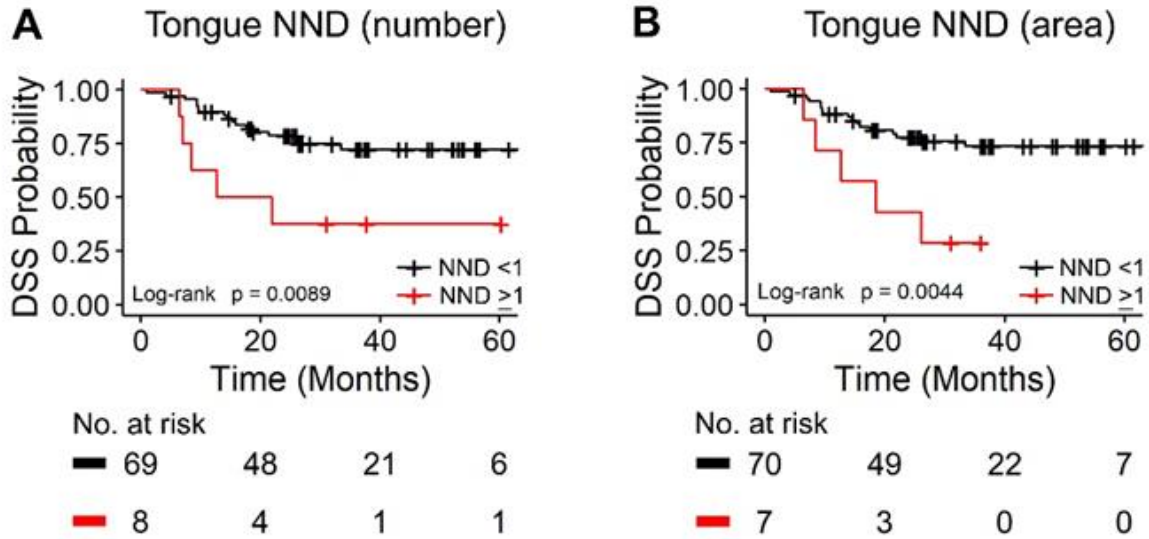

**Supplementary Figure 2:** Tongue SCC patients with IND equal or larger than T-AND have poor DSS. **A** and **B**, Tongue NND measured by number (**A**) and area (**B**) of nerves.  $NND \geq 1$  in the tongue associates with poor DSS. Kaplan-Meier survival curves with log-rank statistics are shown and the number of patients at risk for each time point is shown below each plot.
