# Supplementary material
Source: PubMed Central journal article supplement (PMC10371054)
Supplement: NIHMS1881772-supplement-3.pdf [file NIHMS1881772-supplement-3.pdf]

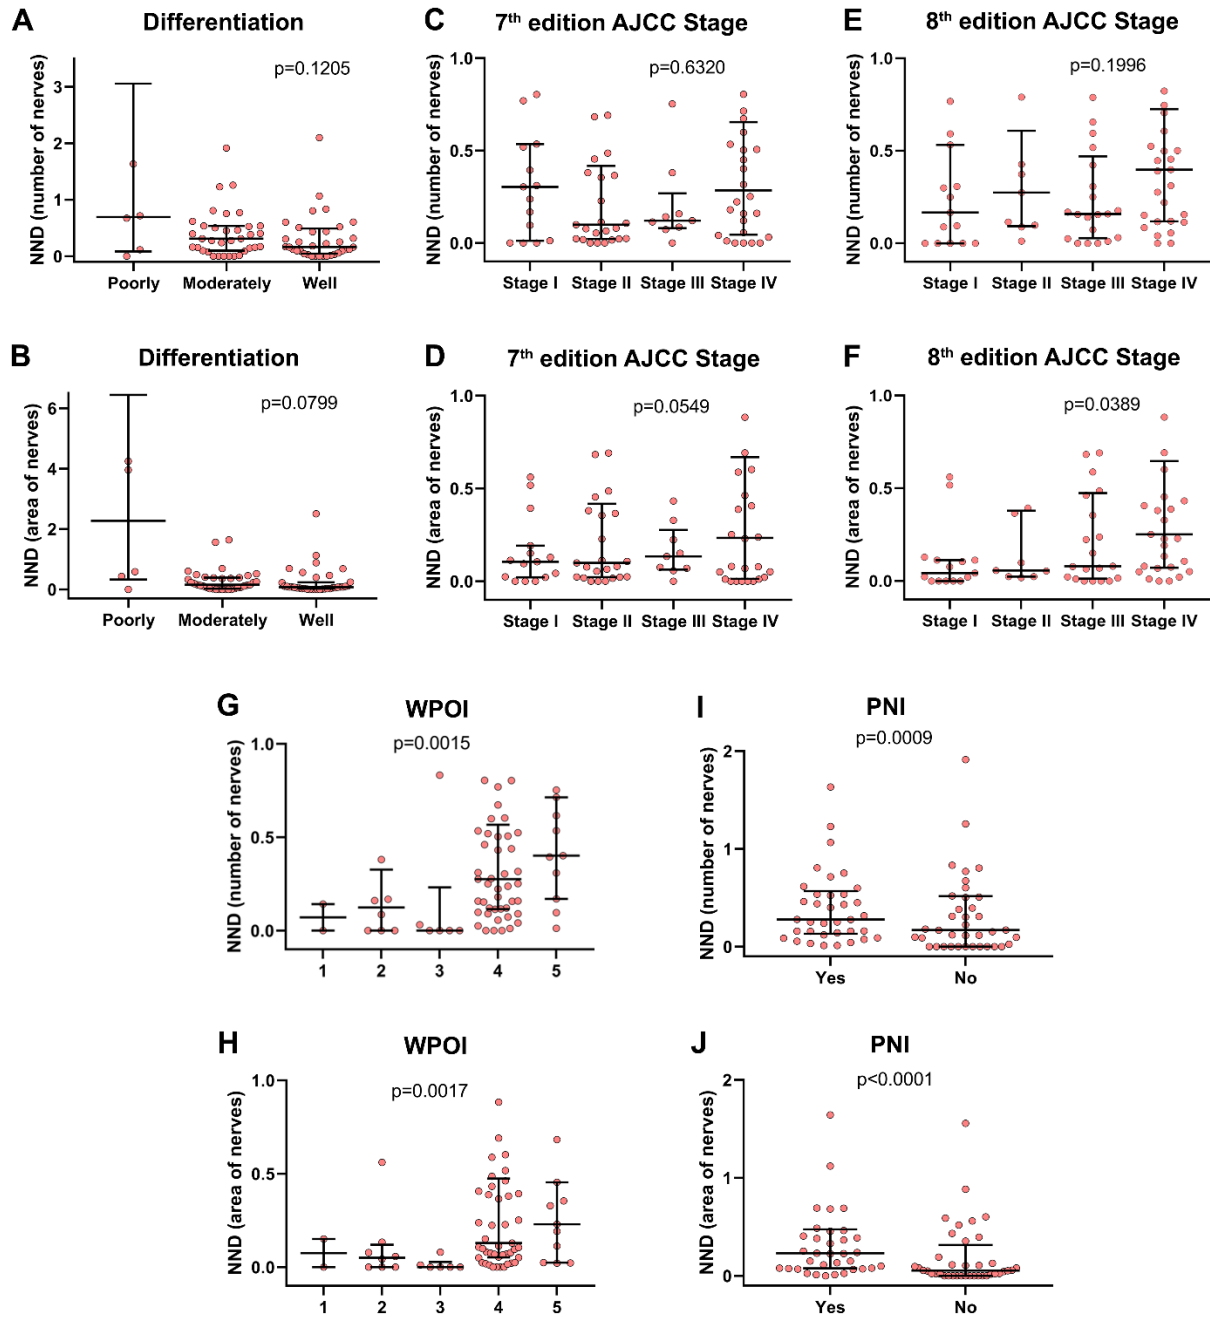

**Supplementary Figure 3:** NND in the tongue associates with pattern of invasion and perineural invasion. **A** and **B**, NND measured by number (**A**) and area (**B**) of nerves, with patients grouped by tumor differentiation. **C** through **F**, NND measured by number (**C** and **E**) and area (**D** and **F**) of nerves, with patients grouped by AJCC 7<sup>th</sup> edition (**C** and **D**) or AJCC 8<sup>th</sup> edition (**E** and **F**) clinical stage. **G** and **H**, NND measured by number (**G**) and area (**H**) of nerves, with patients grouped by worse pattern of invasion (WPOI). **I** and **J**, NND measured by number (**I**) and area (**J**) of nerves, with patients grouped by perineural invasion (PNI) status. Kruskal-Wallis test was used in **A** through **H**; Mann-Whitney test used in **I** and **J**. Significance level at  $p < 0.05$ . A maximum of 8 data points were excluded from the plots for best visualization; all data points are included for statistical analysis.
