# Supplementary material
Source: PubMed Central journal article supplement (PMC10371054)
Supplement: NIHMS1881772-supplement-4.pdf [file NIHMS1881772-supplement-4.pdf]

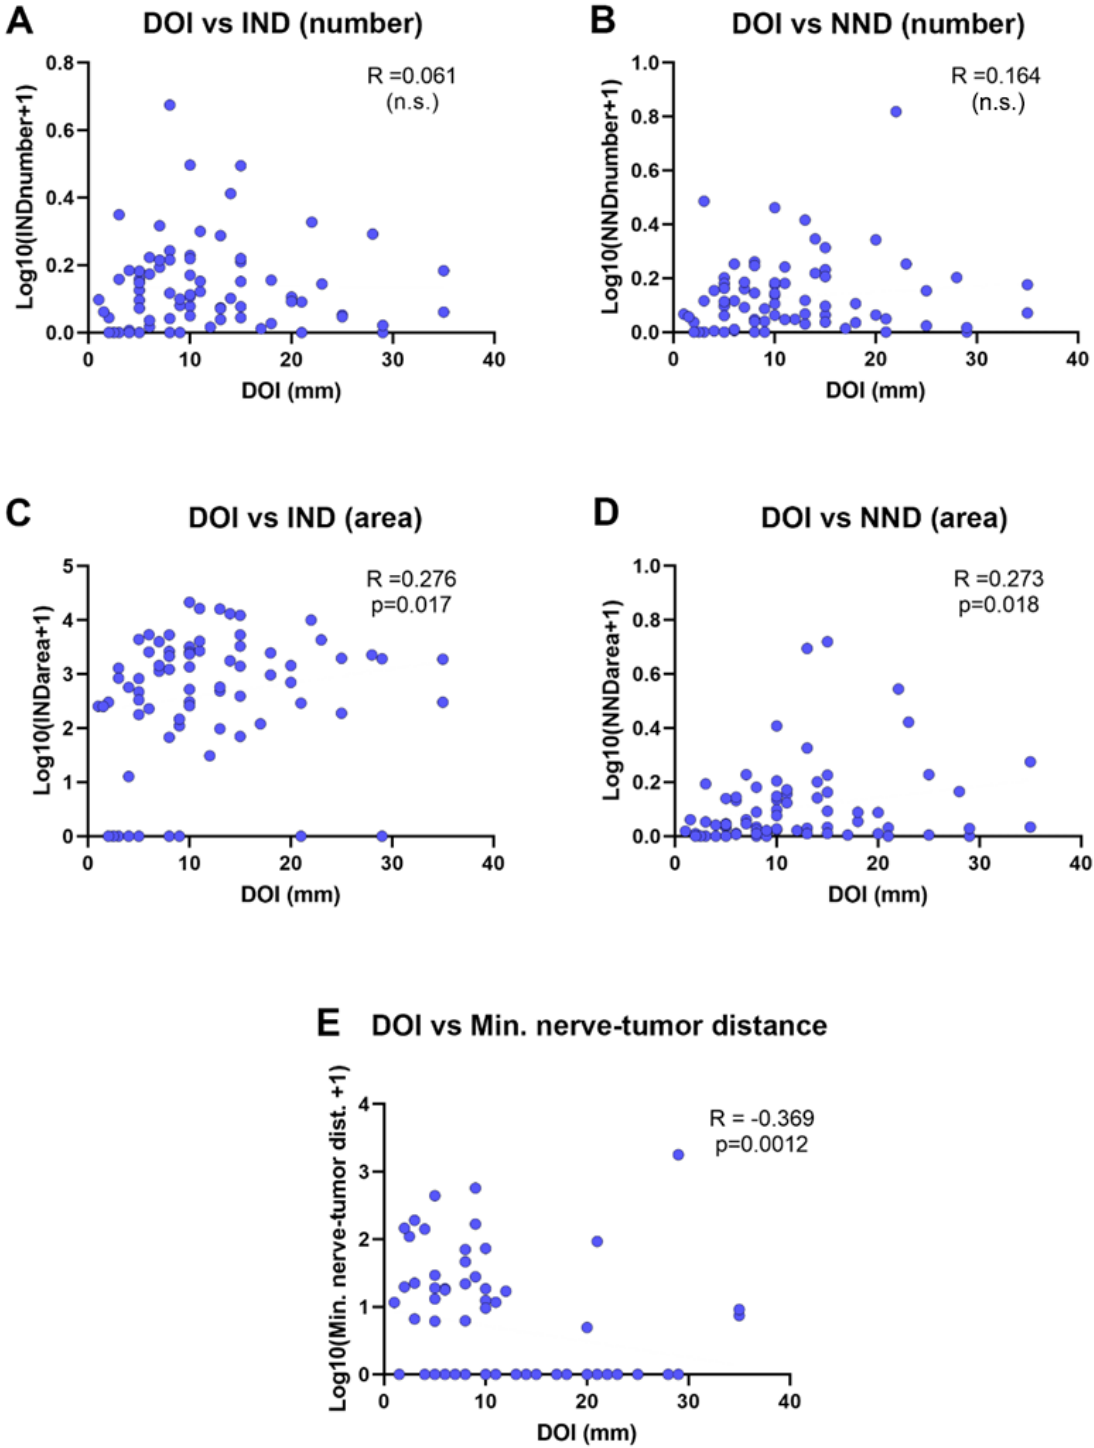

**Supplementary Figure 4:** Correlation between depth of invasion (DOI) and nerve density measurements (IND and NND), and nerve-tumor distance in tongue SCC. Spearman’s correlation with significance level at  $p < 0.05$  was used. Data is from 74 tongue SCC patients with available DOI information in pathology reports, from the total of 77 patients with NND information.
