# Supplementary material
Source: PubMed Central journal article supplement (PMC10371054)
Supplement: NIHMS1881772-supplement-5.pdf [file NIHMS1881772-supplement-5.pdf]

**Supplementary Table S1:** Adjusted Cox modeling of intratumoral and normalized nerve density in tongue SCC\*

| Parameter                             | N  | P-value      | DSS                       |
|---------------------------------------|----|--------------|---------------------------|
|                                       |    |              | HR [CI]                   |
| <b>By <u>number</u> of nerves</b>     |    |              |                           |
| Intratumoral nerve density (IND)      | 77 | <b>0.024</b> | <b>3.12 [1.16, 8.37]</b>  |
| Normalized nerve density (NND)        | 77 | <b>0.011</b> | <b>4.08 [1.38, 12.09]</b> |
| <b>By total <u>area</u> of nerves</b> |    |              |                           |
| Intratumoral nerve density (IND)      | 77 | <b>0.034</b> | <b>1.97 [1.05, 3.69]</b>  |
| Normalized nerve density (NND)        | 77 | <b>0.037</b> | <b>2.08 [1.04, 4.14]</b>  |

\* Adjusted for tumor clinical stage (AJCC 7<sup>th</sup> edition), differentiation, and comorbidities.

HR = hazard ratio

CI = 95% confidence interval

Values in bold indicate significance at  $p < 0.05$

IND and NND values were log-transformed to fit the model
