# Supplementary material
Source: PubMed Central journal article supplement (PMC10371054)
Supplement: NIHMS1881772-supplement-6.pdf [file NIHMS1881772-supplement-6.pdf]

**Supplementary Table S2:** Adjusted Cox modeling of IND and NND in tongue SCC\*

|                                       | <b>DSS</b> |                |                          |
|---------------------------------------|------------|----------------|--------------------------|
| <b>Parameter</b>                      | <b>N</b>   | <b>P-value</b> | <b>HR [CI]</b>           |
| <b>By <u>number</u> of nerves</b>     |            |                |                          |
| Intratumoral nerve density (IND)      | 77         | 0.062          | 2.46 [0.96, 6.31]        |
| Normalized nerve density (NND)        | 77         | <b>0.031</b>   | <b>2.98 [1.10, 8.02]</b> |
| <b>By <u>total area</u> of nerves</b> |            |                |                          |
| Intratumoral nerve density (IND)      | 77         | 0.190          | 1.60 [0.79, 3.22]        |
| Normalized nerve density (NND)        | 77         | 0.105          | 1.62 [0.90, 2.90]        |

\* Adjusted for tumor clinical stage (AJCC 8<sup>th</sup> edition), differentiation, and comorbidities.

HR = hazard ratio

CI = 95% confidence interval

Values in bold indicate significance at  $p < 0.05$

IND and NND values were log-transformed to fit the model
