# Supplementary material
Source: PubMed Central journal article supplement (PMC10371054)
Supplement: NIHMS1881772-supplement-7.pdf [file NIHMS1881772-supplement-7.pdf]

**Supplementary Table S3:** Adjusted Cox regression modeling of NND\*.

| <b>Parameter</b> | <b>Group</b> | <b>N</b> | <b>p-value</b> | <b>DSS</b> |              |
|------------------|--------------|----------|----------------|------------|--------------|
|                  |              |          |                | <b>HR</b>  | <b>CI</b>    |
| NND by number    | $\geq 1$     | 8        | 0.074          | 2.75       | (0.91, 8.34) |
|                  | $< 1$        | 69       | ref.           | 1.0        |              |
| NND by area      | $\geq 1$     | 7        | 0.325          | 1.83       | (0.55, 6.11) |
|                  | $< 1$        | 70       | ref.           | 1.0        |              |

\* Adjusted for tumor clinical stage (AJCC 7<sup>th</sup> edition), differentiation, and comorbidities.

HR = hazard ratio

CI = 95% confidence interval

IND and NND values were log-transformed to fit the model
