# Supplementary material
Source: PubMed Central journal article supplement (PMC10371054)
Supplement: NIHMS1881772-supplement-8.pdf [file NIHMS1881772-supplement-8.pdf]

**Supplementary Table S4:** Adjusted Cox regression modeling of NND\*

| <b>Parameter</b> | <b>Group</b> | <b>N</b> | <b>p-value</b> | <b>DSS</b> |              |
|------------------|--------------|----------|----------------|------------|--------------|
|                  |              |          |                | <b>HR</b>  | <b>CI</b>    |
| NND by number    | $\geq 1$     | 8        | 0.279          | 1.88       | (0.60, 5.91) |
|                  | $< 1$        | 69       | ref.           | 1.0        |              |
| NND by area      | $\geq 1$     | 7        | 0.840          | 1.17       | (0.25, 5.55) |
|                  | $< 1$        | 70       | ref.           | 1.0        |              |

\* Adjusted for tumor clinical stage (AJCC 8<sup>th</sup> edition), differentiation, and comorbidities.

HR = hazard ratio

CI = 95% confidence interval

IND and NND values were log-transformed to fit the model
